# Supplementary material
Source: PubMed Central journal article supplement (PMC1820673)

|    |               |                              |     |
|----|---------------|------------------------------|-----|
| A) | (-7810/-7782) | <u>TGCTTGCTGCAGG</u>         | 46% |
|    | (-8062/-8050) | <u>AGATCACC</u> <u>GCACA</u> | 46% |
|    | (-8023/-8011) | <u>TCCCAATGAGCG</u>          | 54% |
|    | (-7992/-7980) | GCTCC <u>ACTCAGCC</u>        | 54% |
|    | (-7982/-7970) | GC <u>CTTGTTTAGGA</u>        | 46% |
|    | (-7869/-7857) | <u>TGCAAATTTGCGA</u>         | 46% |
|    | (-7957/-7945) | <u>TTTTATGGCTGCA</u>         | 46% |
|    | (-7839/-7827) | <u>TATTGTCATATTT</u>         | 38% |
|    | Ins C1        | <u>TGCAGCTTCAGCC</u>         | 69% |
|    | MARE          | TGCTGACTCAGCA                |     |

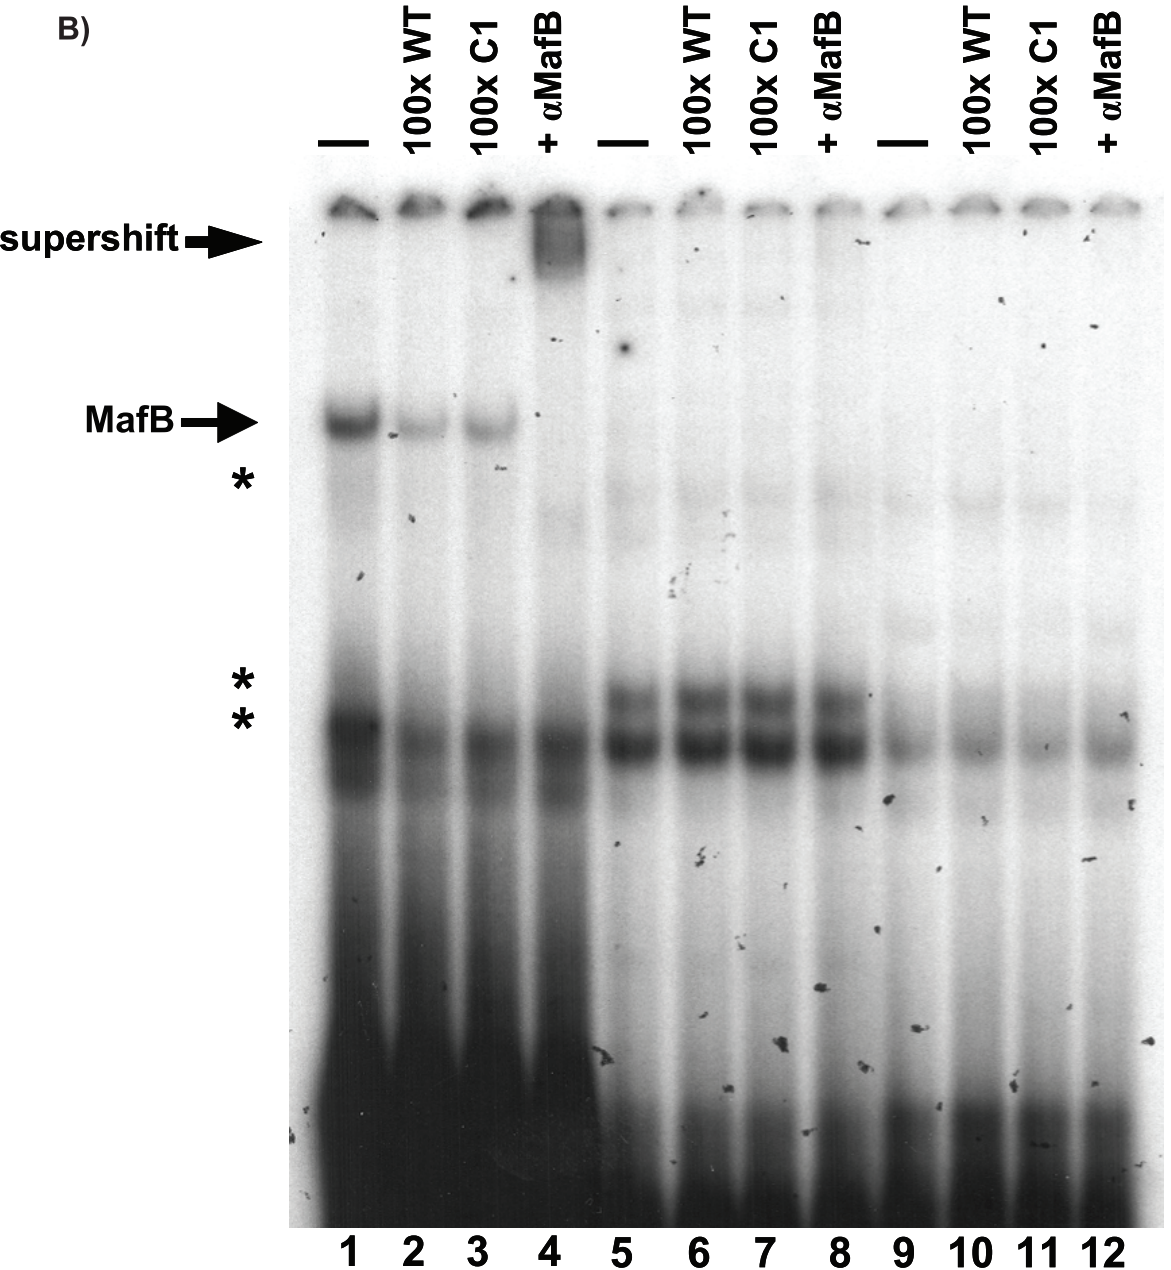

Supplement: pnas_0700013104_2.pdf [file pnas_0700013104_2.pdf]
