# Supplementary material
Source: PubMed Central journal article supplement (PMC1820673)

wild type

MafB<sup>-/-</sup>

Nkx2.2/INS

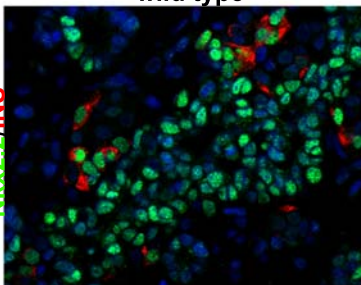

Nkx2.2+/INS+ 25.0%

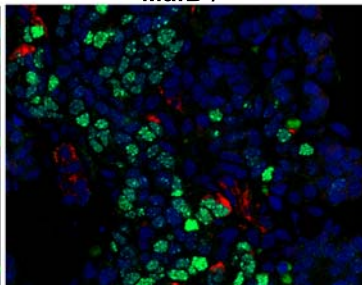

Nkx2.2+/INS+ 9.5%

Brn4/GLU

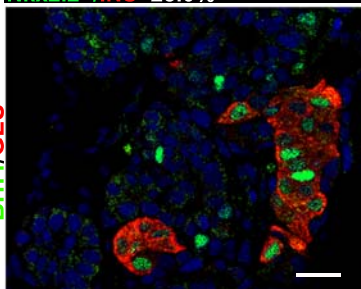

Brn4+/GLU+ 47.9%

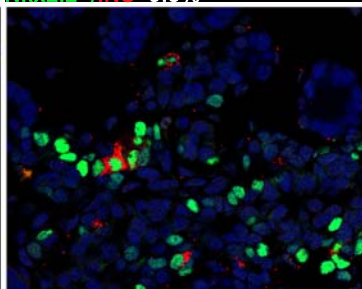

Brn4+/GLU+ 26.2%

Supplement: pnas_0700013104_1.pdf [file pnas_0700013104_1.pdf]
